# Supplementary material for: Fine-scale genetic mapping of a hybrid sterility factor between Drosophila simulans and D. mauritiana: The varied and elusive functions of "speciation genes".
Source: Springer Nature journal article supplement (doi:10.1186/1471-2148-10-385), 2010-01-01

# GENOTYPE

# PHENOTYPE

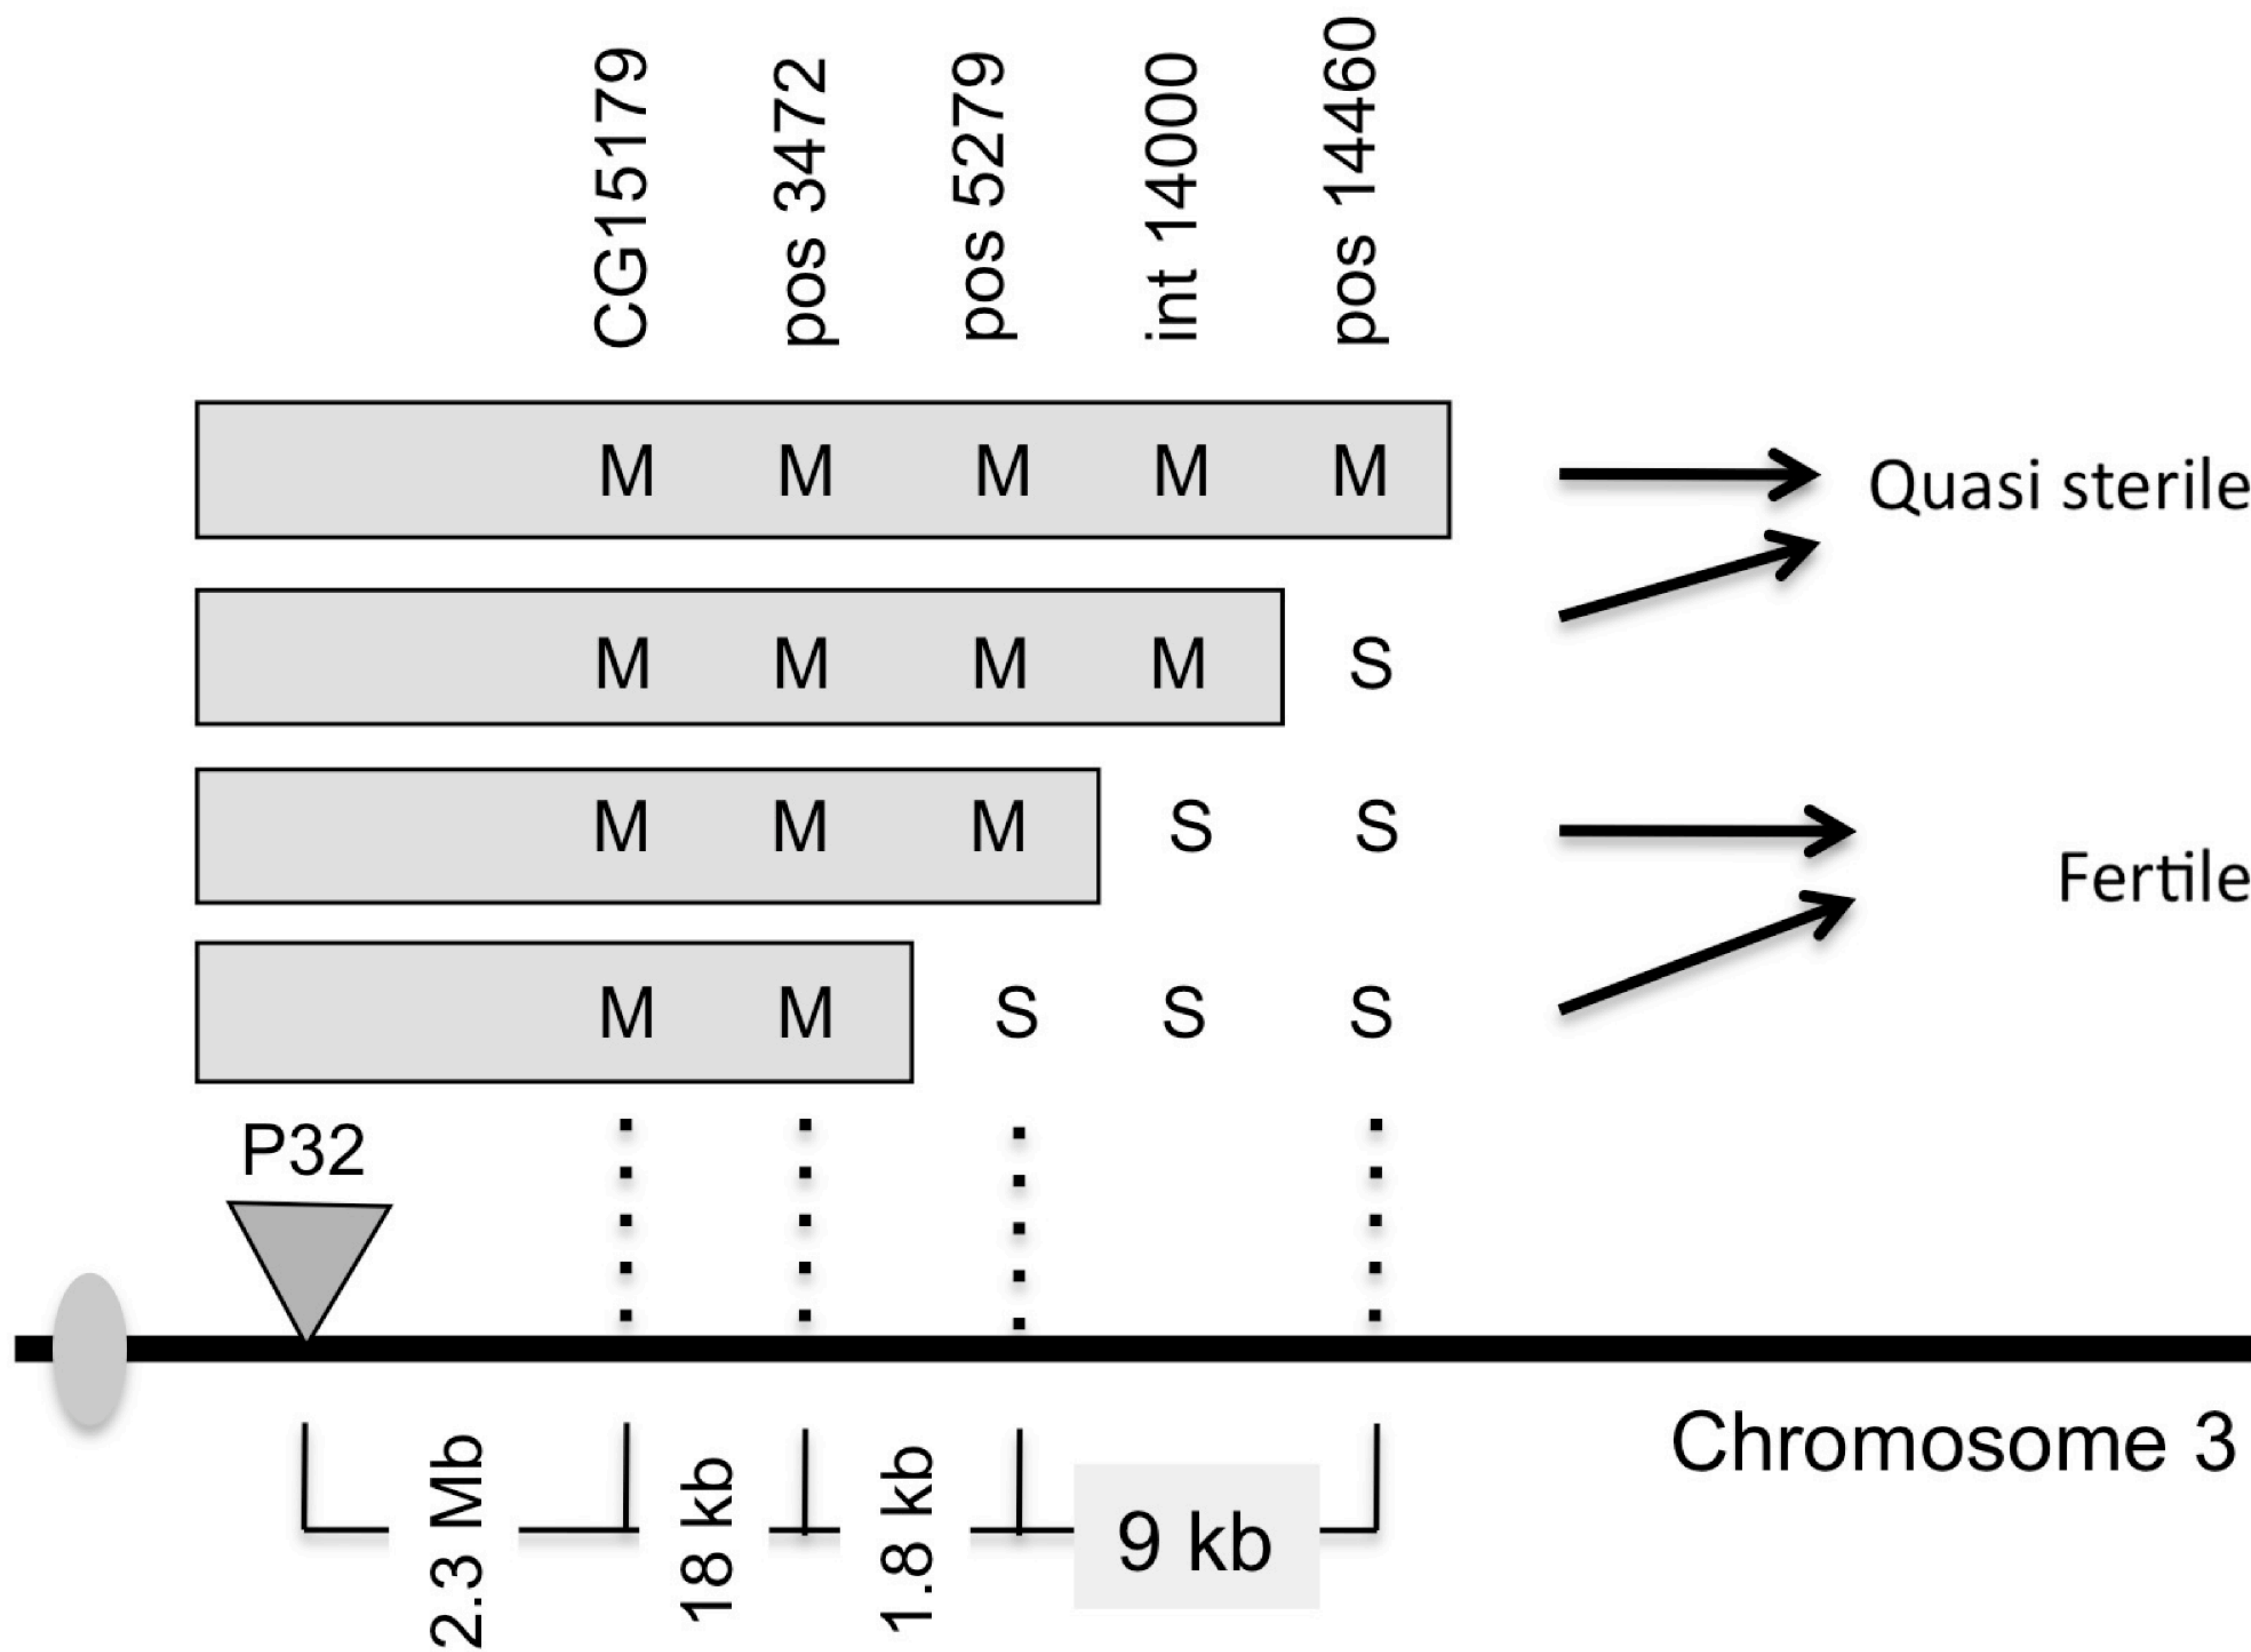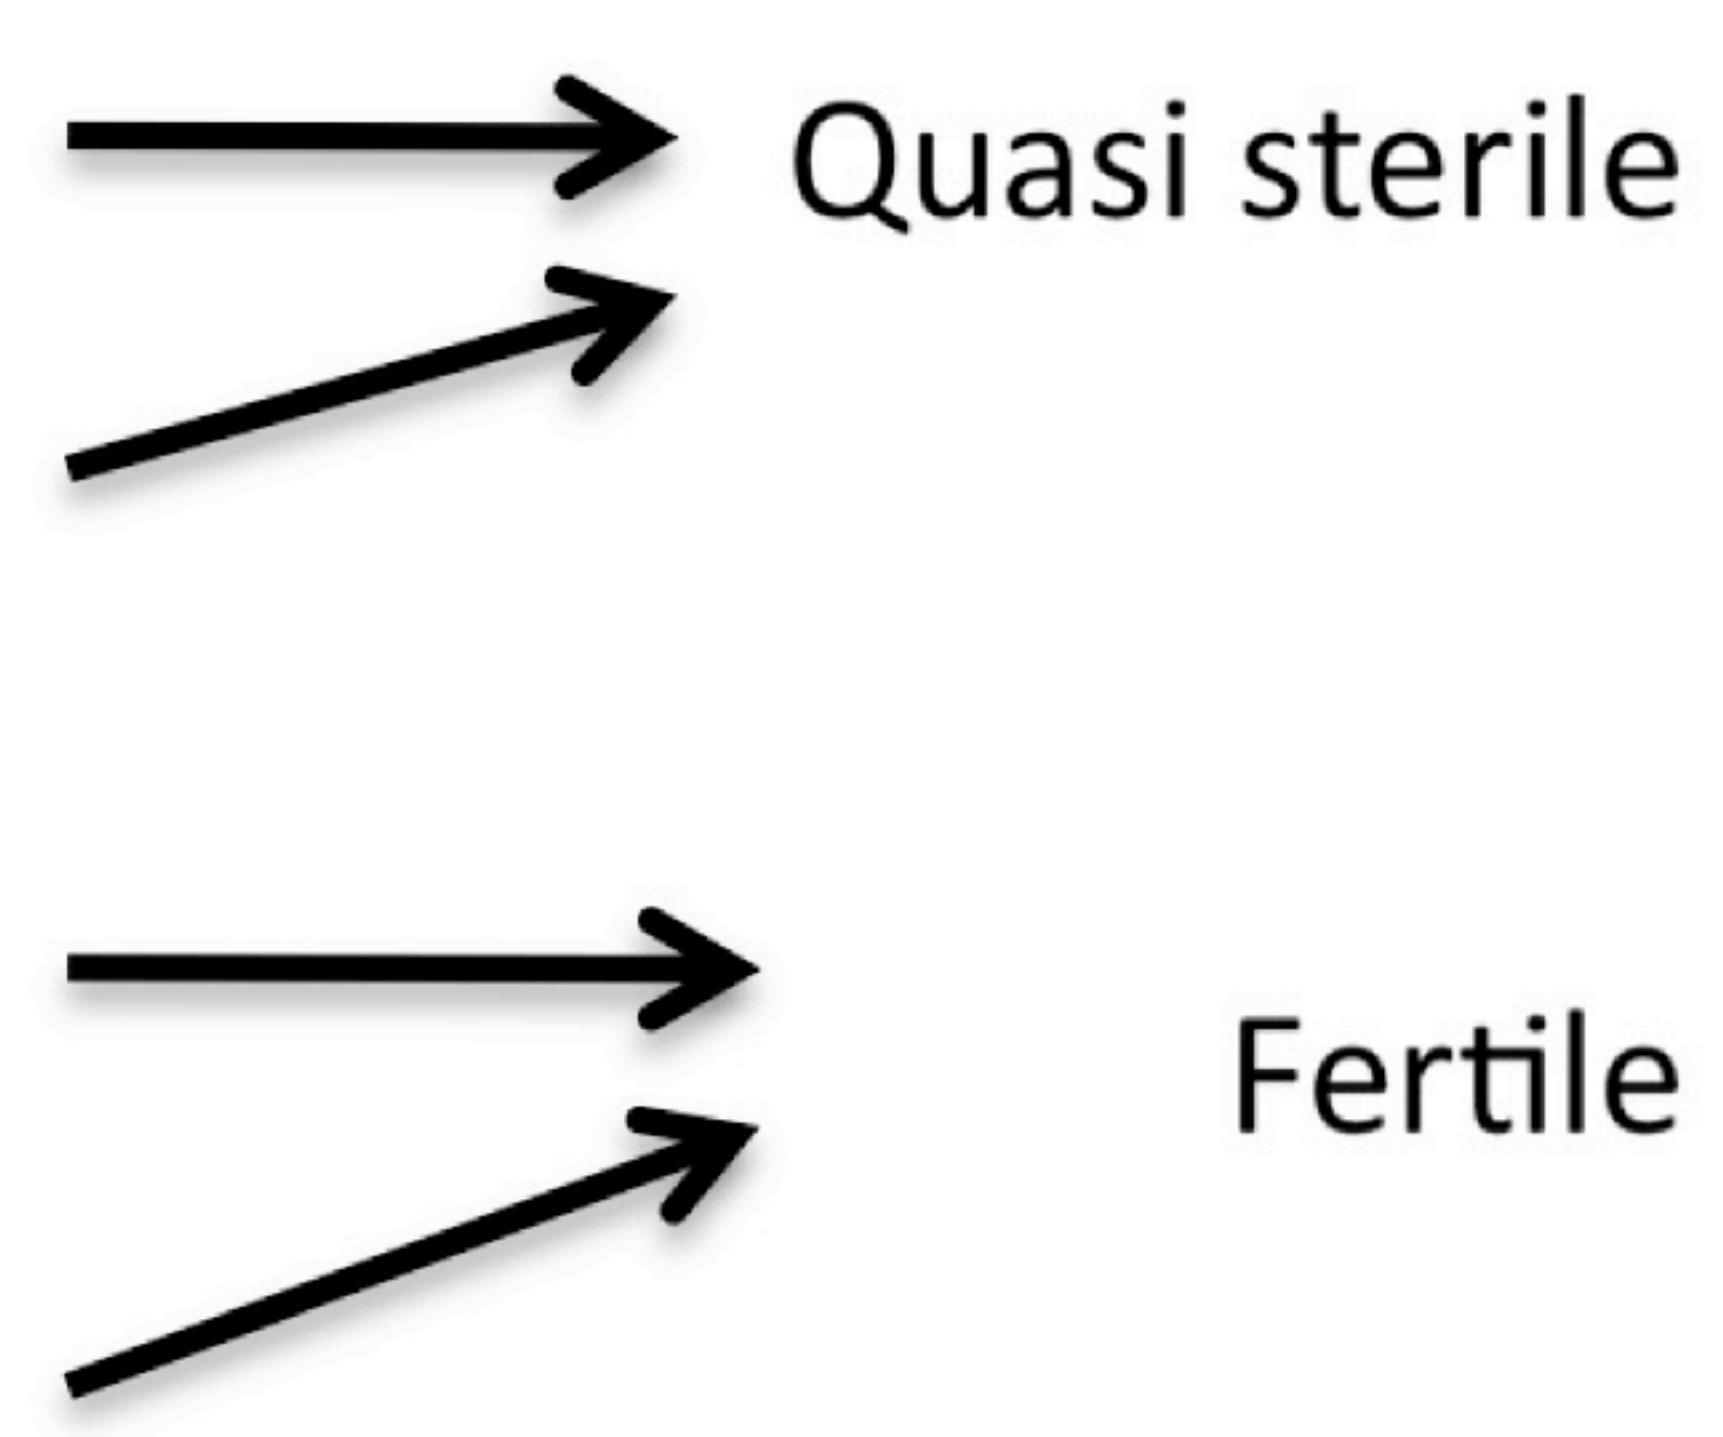

## Fertility (mean)

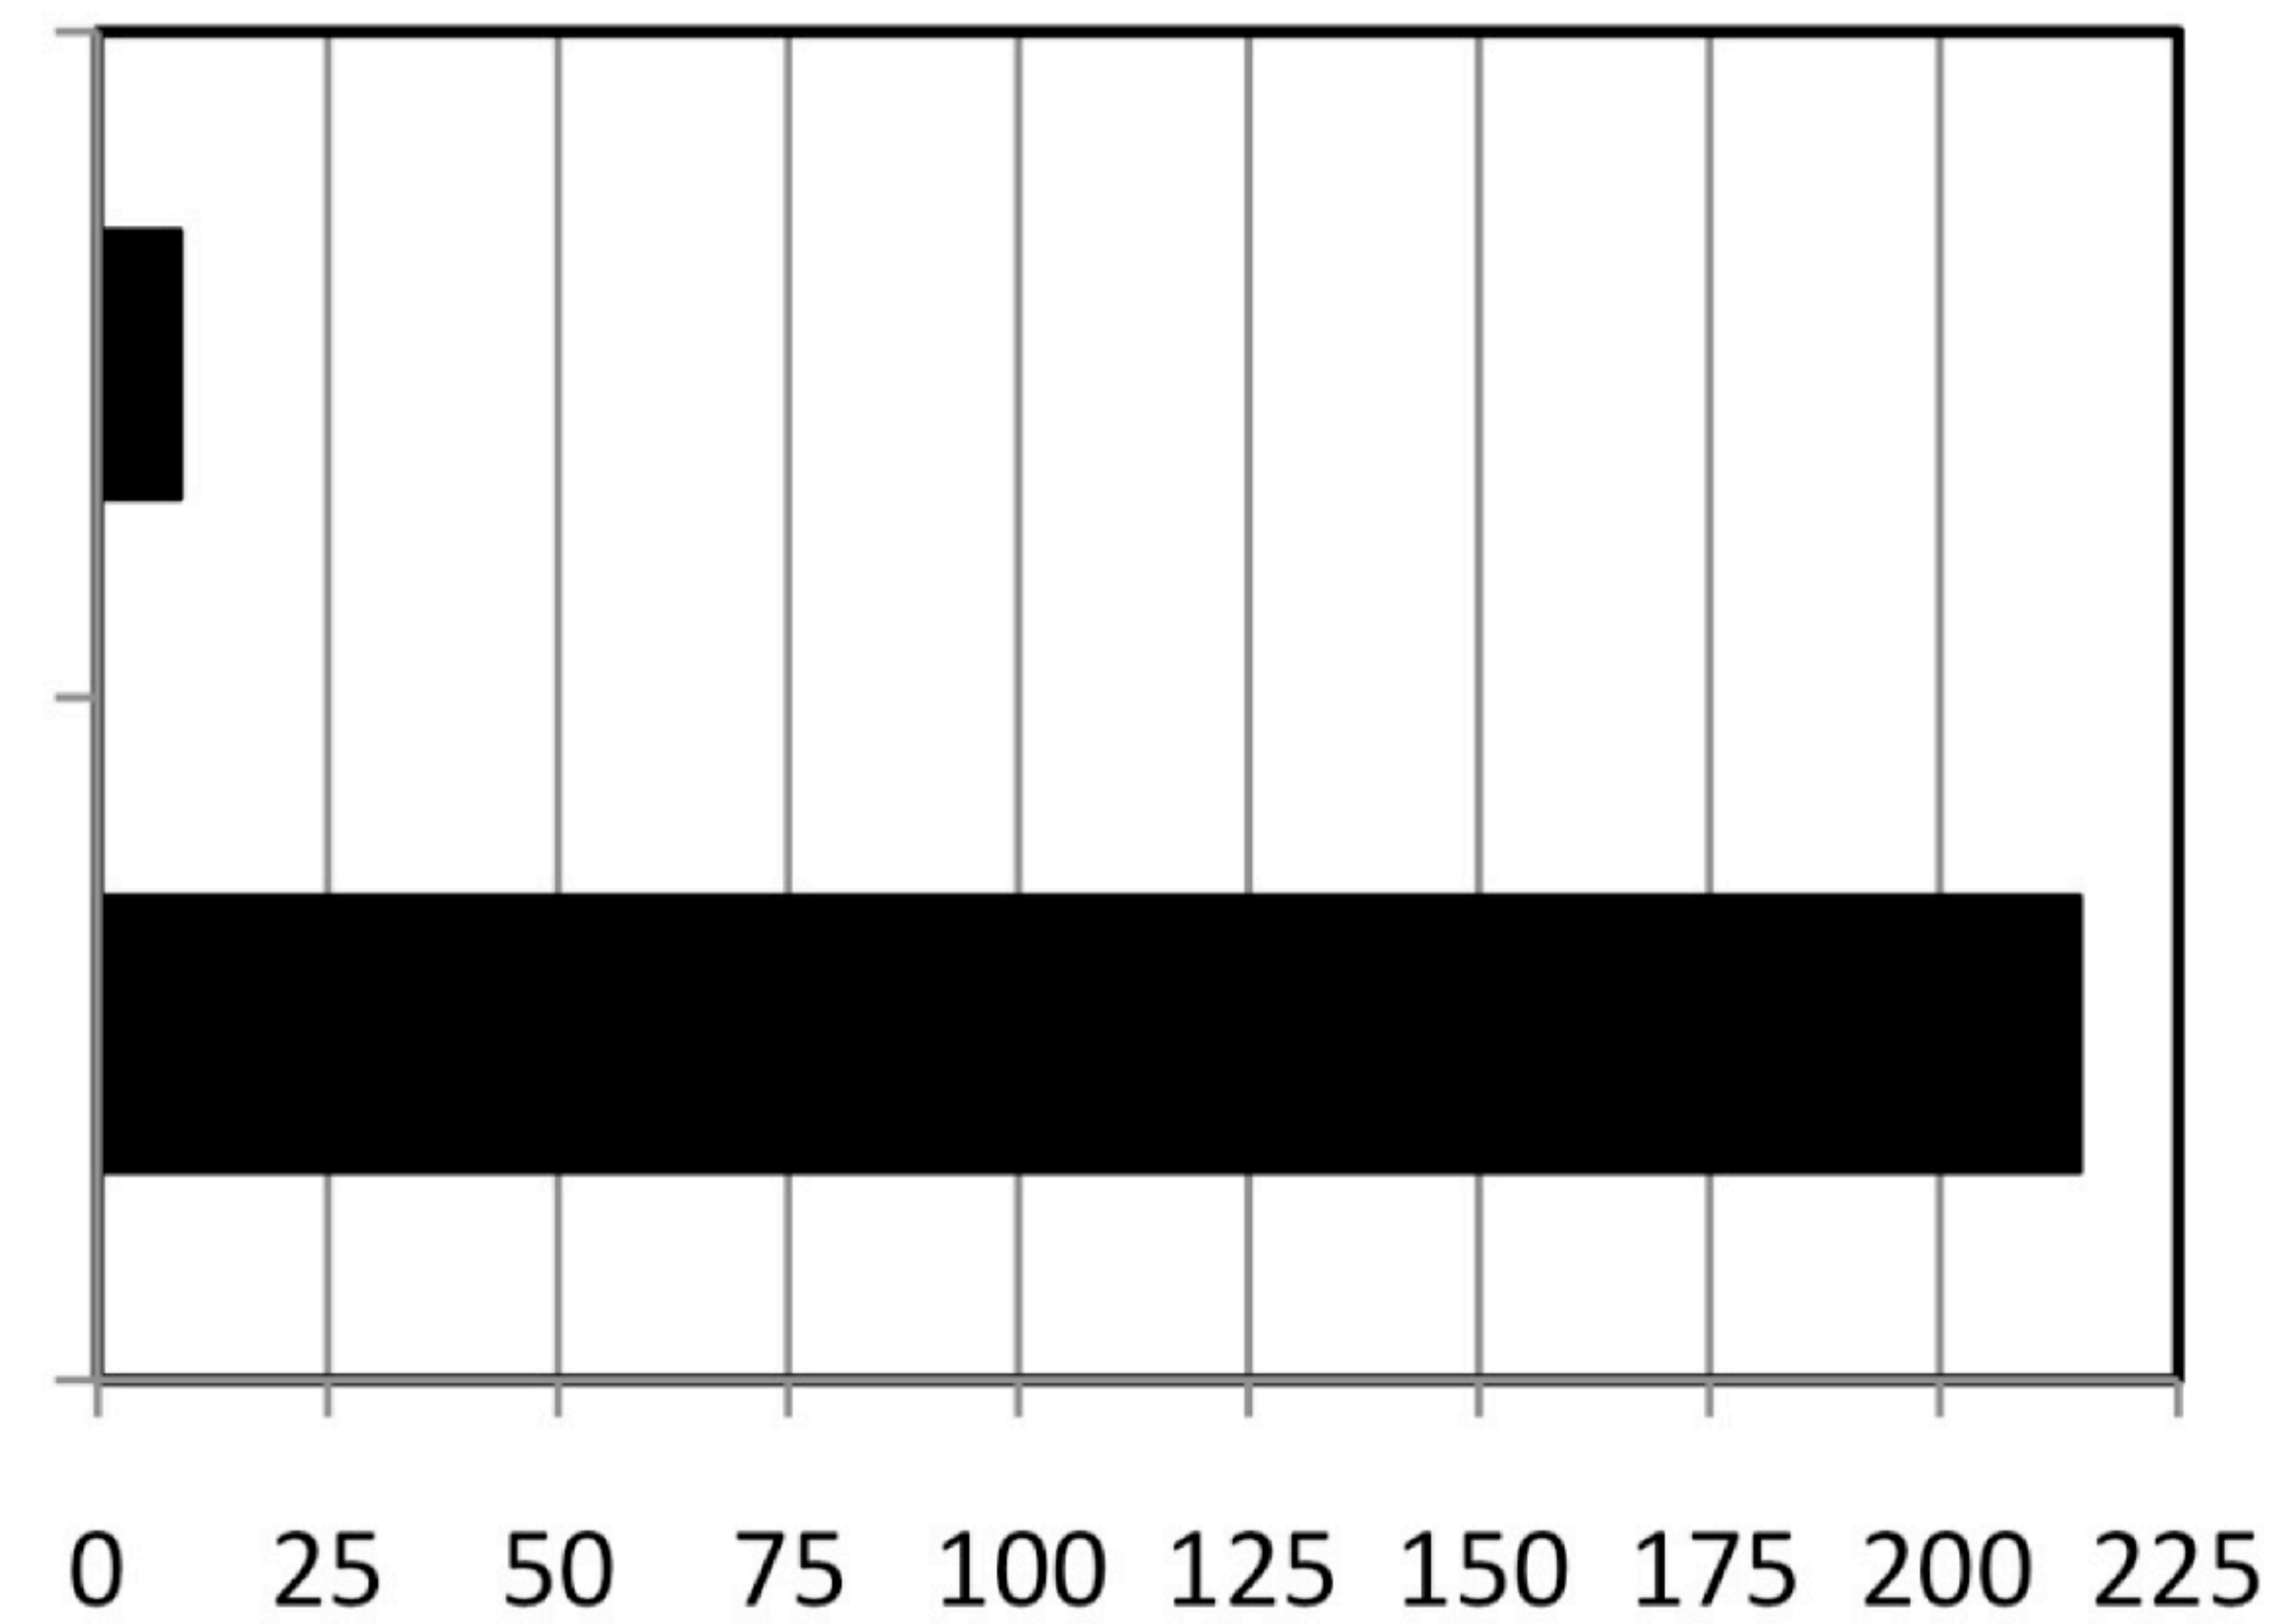

Supplement: 12862_2010_1600_MOESM8_ESM.pdf [file 12862_2010_1600_MOESM8_ESM.pdf]
